# Supplementary figures and images for: Papillary Thyroid Carcinoma Variants are Characterized by Co-dysregulation of Immune and Cancer Associated Genes
Source: MDPI journal article supplement (doi:10.3390/cancers11081179), 2019-08-15

## Differentially Expressed IA Genes niFVPTC vs iFVPTC

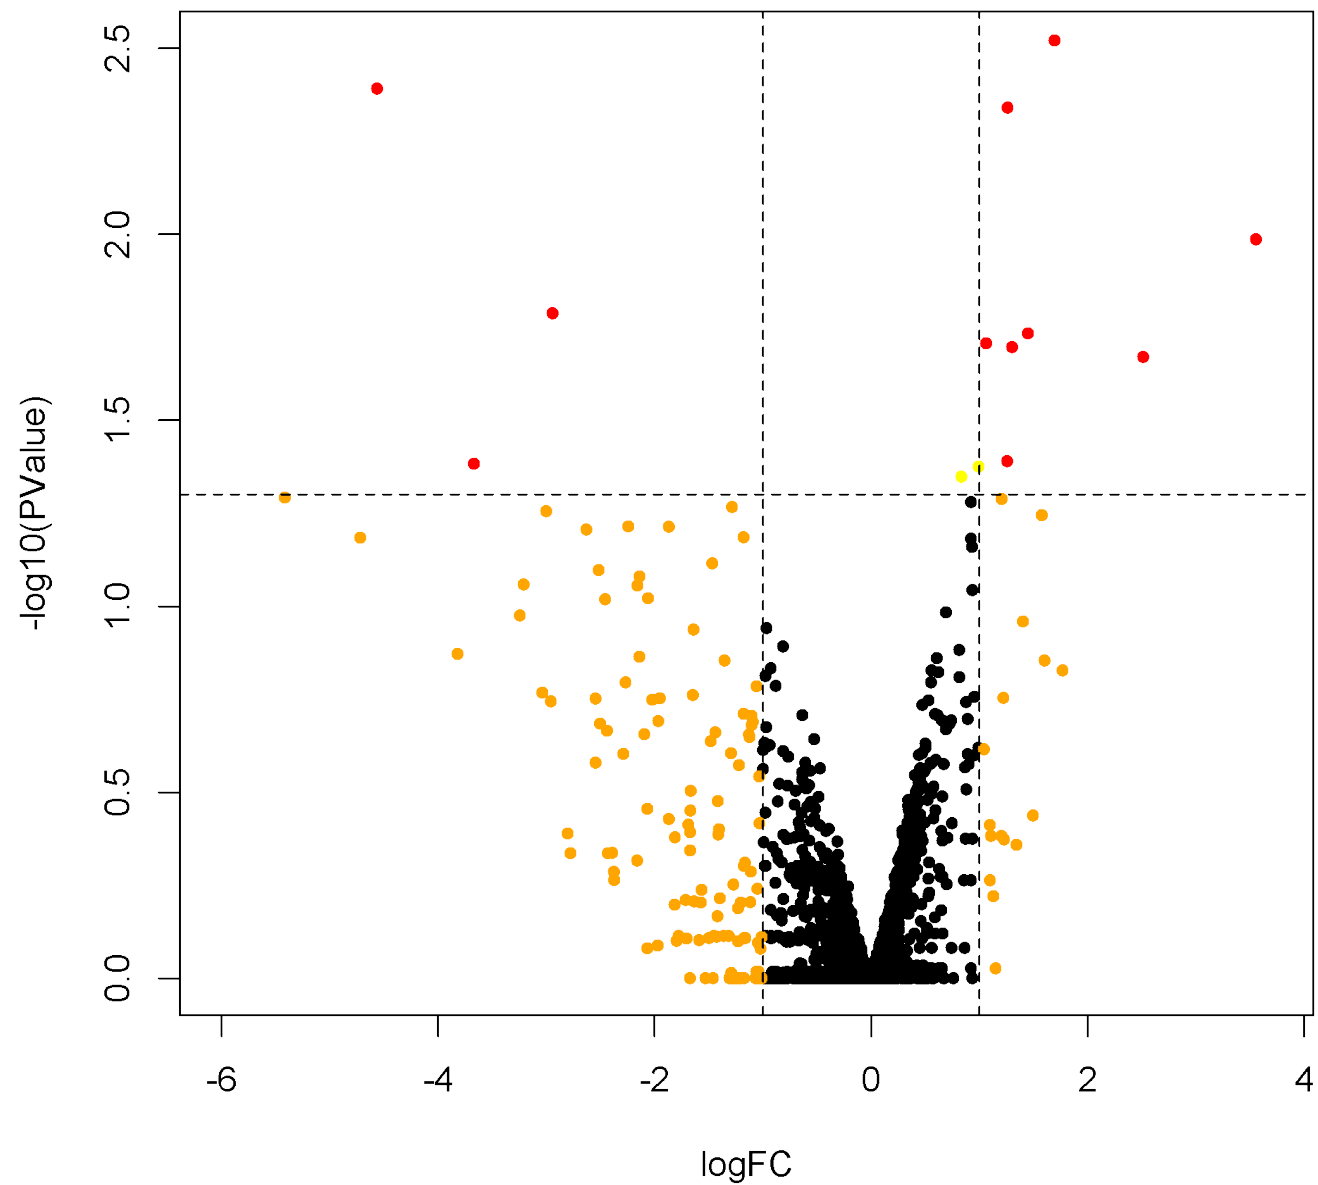[illegible]

Supplement: s1 [file s1]
